# Supplementary material
Source: publisher figshare collection journal article supplement (https://acs.figshare.com/ndownloader/files/4684843)
Supplement: Supplementary file 1 [file 4684843]

## Supporting Information

# An *in-situ* study of the adsorption behavior of functionalized nanoparticles on self-assembled monolayers via different chemical interactions

Xing Yi Ling,<sup>a,†</sup> Laurent Malaquin,<sup>b,‡,‡</sup> David N. Reinhoudt,<sup>a</sup> Heiko Wolf,<sup>b,\*</sup> and Jurriaan Huskens<sup>a,\*</sup>

<sup>a</sup> Laboratories of Molecular Nanofabrication and Supramolecular Chemistry & Technology, MESA+ Institute for Nanotechnology, University of Twente, P.O. Box 217, 7500 AE, Enschede, The Netherlands

<sup>b</sup> IBM Research GmbH, Zurich Laboratory, Säumerstrasse 4, CH-8803, Rüschlikon, Switzerland

<sup>‡</sup> These authors contributed equally to this work

<sup>‡</sup> Present address: Laboratoire de Photonique et de Nanostructures, Route de Nozay, 91460 Marcoussis, France.

[hwo@zurich.ibm.com](mailto:hwo@zurich.ibm.com), [j.huskens@utwente.nl](mailto:j.huskens@utwente.nl)

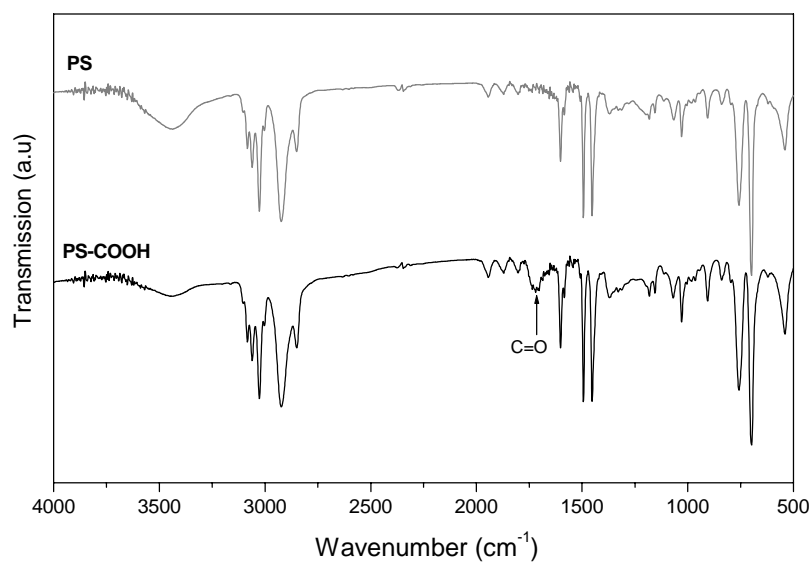

**Figure S1.** FTIR spectra of PS and PS-COOH nanoparticles.

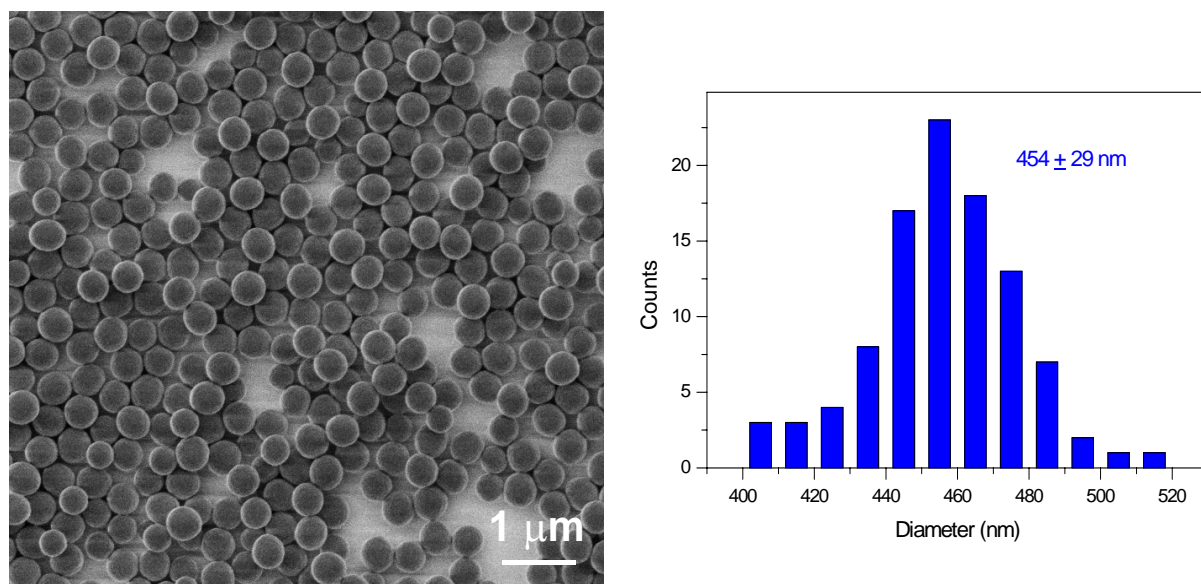

**Figure S2.** SEM image (left) and size distribution histogram (right) of the PS-COOH nanoparticles.

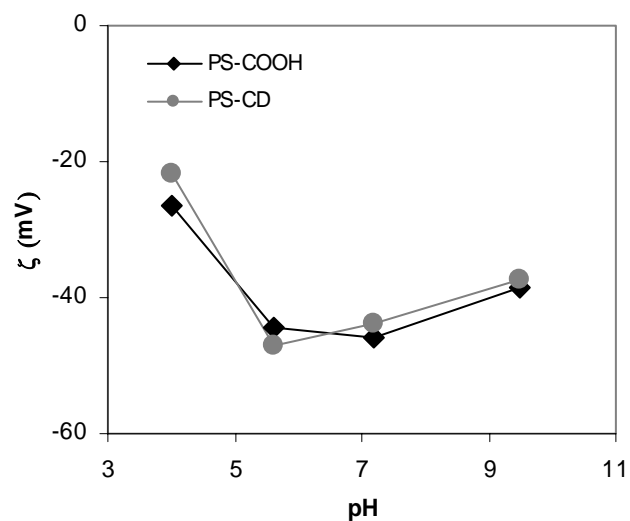

**Figure S3.** Zeta potentials of dispersions of PS-COOH (♦) and PS-CD (●) as a function of the pH of the buffer solution.

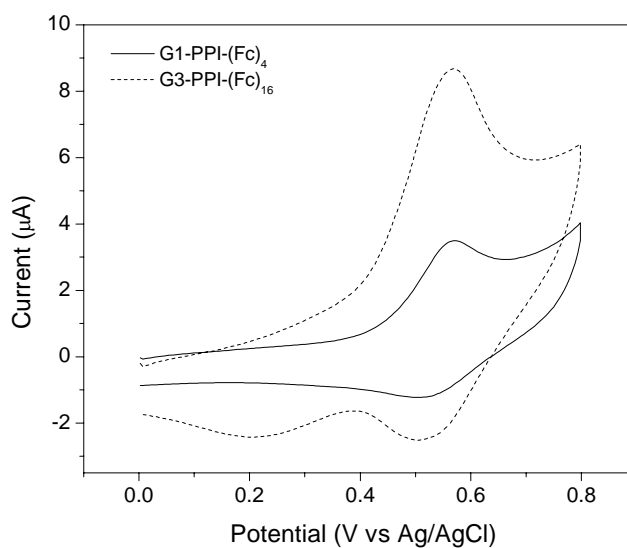

**Figure S4.** Cyclic voltammograms of G1-PPI-(Fc)<sub>4</sub> and G3-PPI-(Fc)<sub>16</sub> dendrimers preadsorbed on β-CD SAMs on gold at scan rate of 0.5 V/s in 0.1 M K<sub>2</sub>SO<sub>4</sub> aqueous solution between 0 – 0.8 V vs Ag/AgCl.

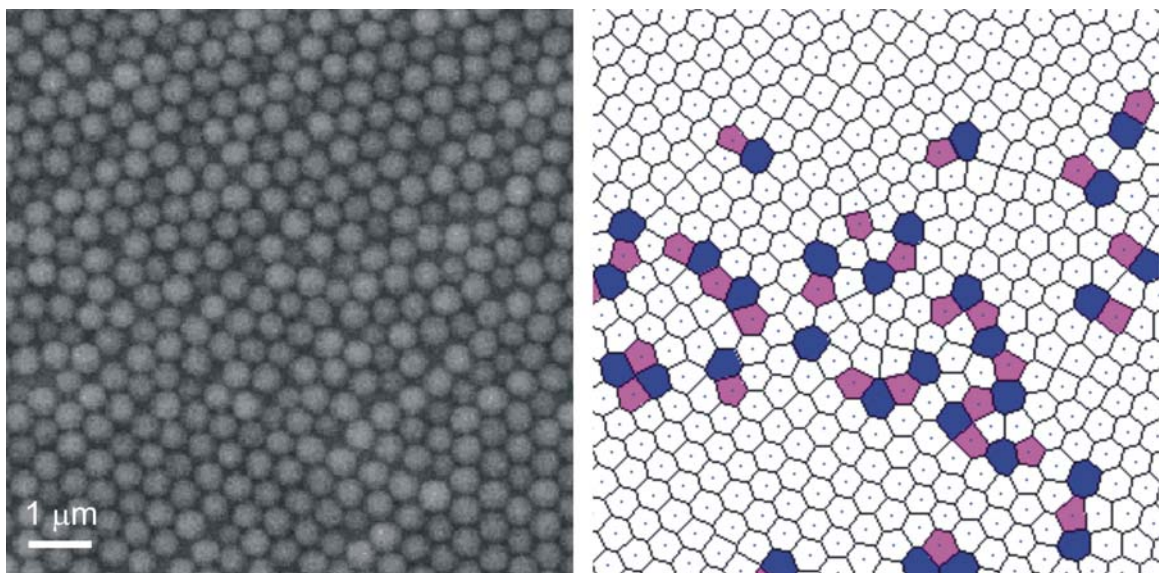

**Figure S5.** A SEM micrograph of the assembled nanoparticles formed by adsorption of PS-COOH on native SiO<sub>2</sub> substrate and its voronoi diagram, where sites with 6 neighbors are unshaded, 5- and 7-fold-coordinated sites are highlighted in magenta and blue, respectively.
